# Supplementary material for: Diversity and Dynamics of Bacterial Communities in the Digestive and Excretory Systems across the Life Cycle of Leafhopper, Recilia dorsalis
Source: MDPI journal article supplement (doi:10.3390/insects14060545), 2023-06-12
Supplement: s1 [file s1]

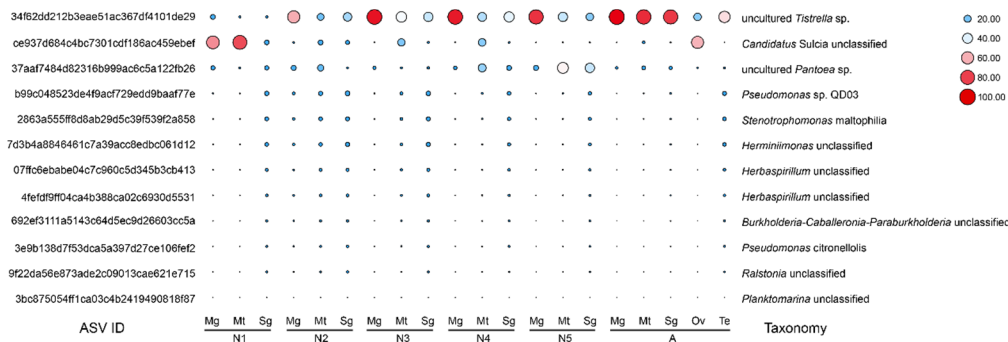

**Figure S1.** Relative abundance of 12 ASVs present in all samples in different tissues of leafhopper *R. dorsalis* at different developmental stages. Circle area corresponds to relative abundance of bacteria in each sample. N1, N2, N3, N4, N5, A refer to 1st-instar nymphs, 2nd-instar nymphs, 3rd-instar nymphs, 4th-instar nymphs, 5th-instar nymphs and adults, respectively. Mg, midgut; Mt, Malpighian tubule; Sg, salivary gland.

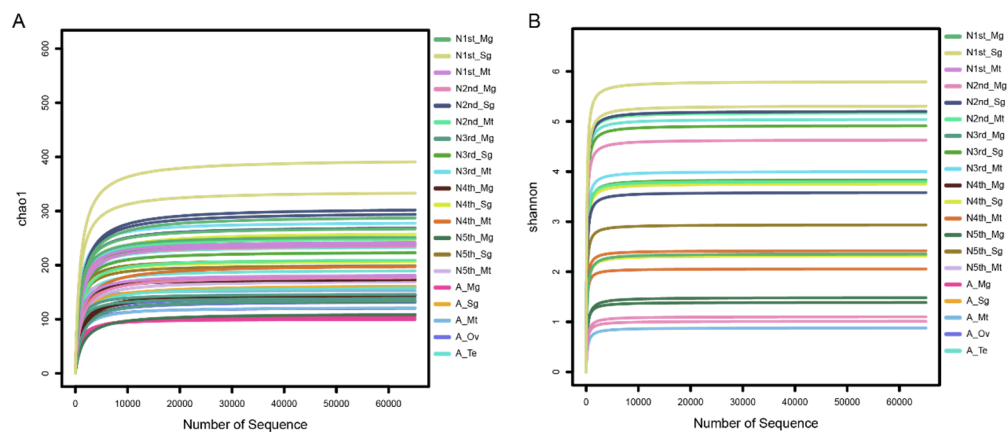

**Figure S2.** Rarefaction curves showing bacterial richness based on the Chao1 index (A) and bacterial richness and evenness on the Shannon index (B).

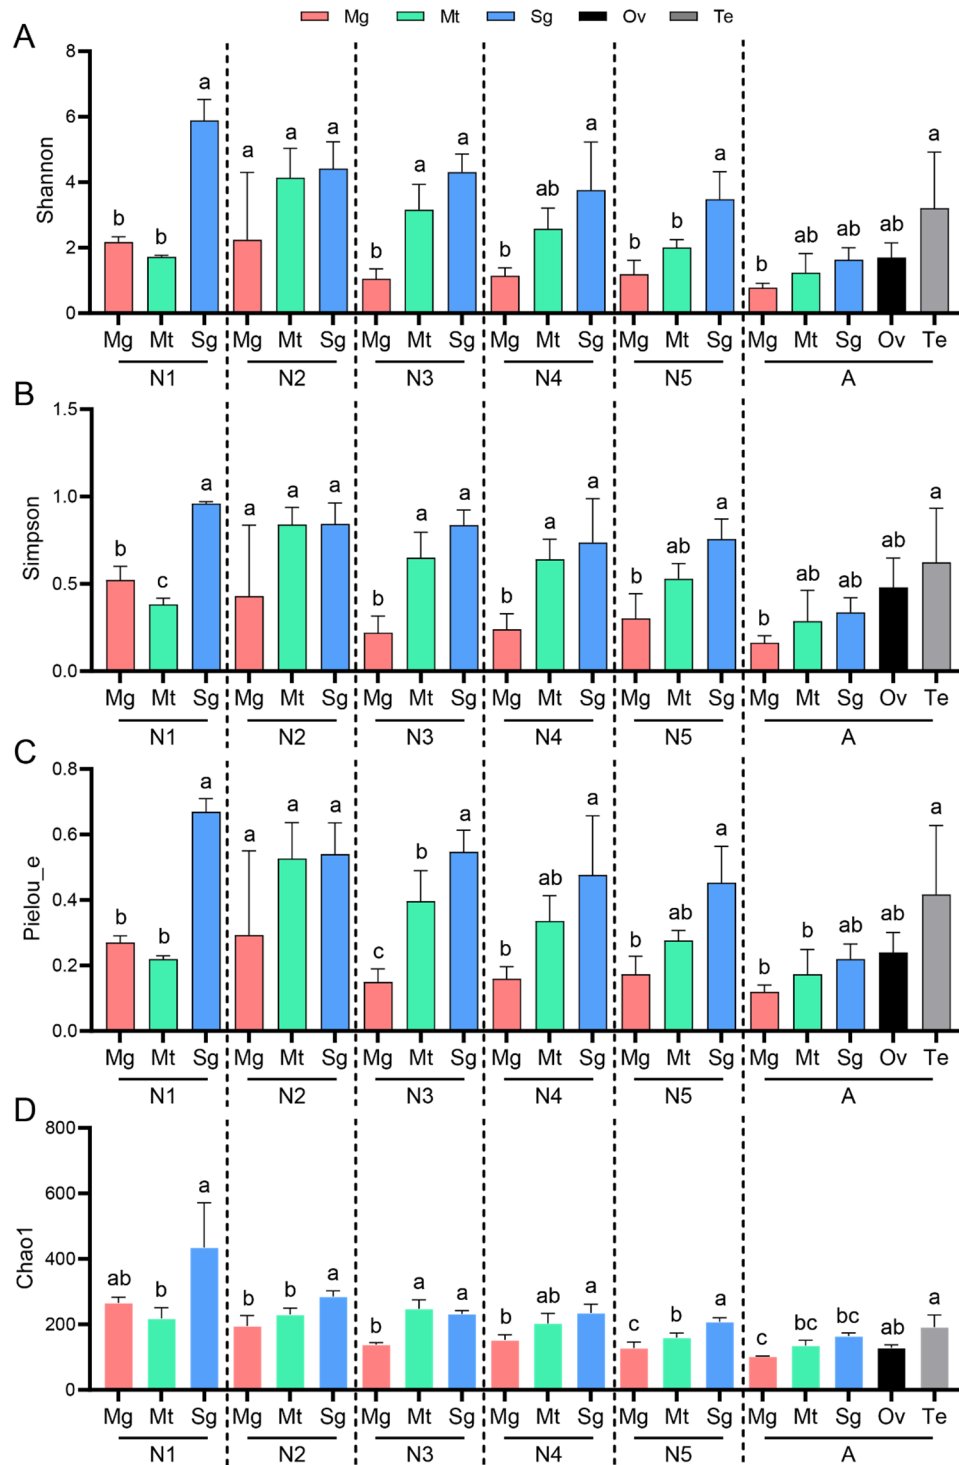

**Figure S3.** Analysis of alpha diversity among different tissues of leafhoppers at the same developmental stage. Shannon (A) and Simpson (B) indexes represent the species diversity, Pielou\_e (C) index represents species evenness, Chao1 (D) species indexes represent species richness. Each bar represents the mean  $\pm$  standard error of three replicates. Different lowercase letters indicate significant differences (ANOVA,  $p < 0.05$ ). N1, N2, N3, N4, N5, A refer to 1st-instar nymphs, 2nd-instar nymphs, 3rd-instar nymphs, 4th-instar nymphs, 5th-instar nymphs and adults, respectively.
